# Supplementary material for: Proteomics Analysis of Hydatigera taeniaeformis Metacestode Stage
Source: PubMed Central journal article supplement (PMC7438934; doi:10.3389/fvets.2020.00474), 2020-08-06
Supplement: Presentation_2.pdf [file Presentation_2.pdf]

**Table S1. Proteins identified in *H. taeniaeformis* metacestodes.**

| ID | Molecular (kDa) | Percent (%) | Unique peptide | Unique Spectra | Description                                        | COG Functional-Categories        | NCBI nr Accession           |
|----|-----------------|-------------|----------------|----------------|----------------------------------------------------|----------------------------------|-----------------------------|
| 1  | 225             | 1.30        | 115            | 187            | myosin heavy chain                                 | Structural/cytoskeletal proteins | gi 674572847 emb CDS41550.1 |
| 2  | 108             | 0.42        | 46             | 64             | paramyosin                                         | -                                | gi 42560539 sp P35418.2     |
| 3  | 882             | 0.27        | 39             | 46             | basement membrane specific heparan sulfate         | -                                | gi 674562108 emb CDS23619.1 |
| 4  | 71              | 0.44        | 35             | 55             | heat shock 70 protein 4                            | Post-translational modification  | gi 674571132 emb CDS43123.1 |
| 5  | 110             | 0.2         | 33             | 42             | spectrin alpha actinin                             | -                                | gi 674561275 emb CDS24366.1 |
| 6  | 112             | 0.2         | 33             | 38             | sodium/potassium-transporting ATPase subunit alpha | Metabolism                       | gi 576693508 gb EUB57119.1  |
| 7  | 70              | 0.46        | 30             | 51             | phosphoenolpyruvate carboxykinase                  | Energy production and conversion | gi 283466482 emb CBH36496.1 |
| 8  | 42              | 0.87        | 27             | 58             | actin                                              | Structural/cytoskeletal proteins | gi 576695773 gb EUB59337.1  |
| 9  | 190             | 0.13        | 26             | 30             | hemicentin 1                                       | -                                | gi 674576561 emb CDS36997.1 |
| 10 | 127             | 0.27        | 26             | 33             | type II collagen B                                 | -                                | gi 674572459 emb CDS42884.1 |
| 11 | 325             | 0.12        | 25             | 29             | titin                                              | -                                | gi 674567709 emb CDS16820.1 |
| 12 | 117             | 0.15        | 25             | 30             | spectrin beta chain brain 3                        | -                                | gi 674573973 emb CDS40896.1 |
| 13 | 72              | 0.23        | 24             | 34             | succinate dehydrogenase flavoprotein subunit       | Energy production and conversion | gi 576699397 gb EUB62925.1  |
| 14 | 37              | 0.67        | 24             | 43             | cytosolic malate dehydrogenase                     | Energy production and conversion | gi 323361126 gb ADX42057.1  |
| 15 | 154             | 0.12        | 23             | 28             | Spectrin beta chain brain 3                        | Structural/cytoskeletal proteins | gi 576699919 gb EUB63443.1  |
| 16 | 73              | 0.15        | 22             | 28             | glycogen phosphorylase                             | Metabolism                       | gi 674566587 emb CDS19687.1 |
| 17 | 97              | 0.16        | 21             | 28             | major vault protein                                | -                                | gi 674561667 emb CDS23982.1 |
| 18 | 42              | 0.18        | 21             | 26             | L-threonine 3-dehydrogenase                        | Metabolism                       | gi 576693761 gb EUB57365.1  |
| 19 | 166             | 0.19        | 20             | 27             | collagen alpha 1V chain                            | -                                | gi 674265696 emb CDI98199.1 |
| 20 | 184             | 0.082       | 20             | 21             | clathrin heavy chain                               | -                                | gi 674267057 emb CDI97445.1 |
| 21 | 47              | 0.38        | 20             | 30             | enolase                                            | Metabolism                       | gi 563425937 gb AHB59732.1  |
| 22 | 40              | 0.24        | 20             | 32             | fructose 16 bisphosphate aldolase                  | Metabolism                       | gi 674574479 emb CDS41408.1 |
| 23 | 28              | 0.16        | 19             | 27             | putative growth regulator 14-3-3                   | Signal transduction              | gi 563425939 gb AHB59733.1  |
| 24 | 166             | 0.086       | 19             | 21             | titin                                              | -                                | gi 576699428 gb EUB62955.1  |
| 25 | 79              | 0.12        | 19             | 24             | molecular chaperone HtpG                           | Post-translational modification  | gi 358339046 dbj GAA47176.1 |
| 26 | 60              | 0.1         | 19             | 19             | ATP synthase subunit alpha mitochondrial           | Energy production and conversion | gi 674562214 emb CDS23514.1 |
| 27 | 69              | 0.13        | 19             | 27             | phosphoglucomutase 2                               | Metabolism                       | gi 674571151 emb CDS43145.1 |
| 28 | 183             | 0.12        | 18             | 20             | filamin                                            | Structural/cytoskeletal proteins | gi 674570113 emb CDS16181.1 |
| 29 | 33              | 0.1         | 18             | 21             | tropomyosin 2 high molecular weight isoform        | -                                | gi 29337029 sp Q95PU1.1     |

|    |     |       |    |    |                                                                      |                                  |                             |
|----|-----|-------|----|----|----------------------------------------------------------------------|----------------------------------|-----------------------------|
| 30 | 56  | 0.1   | 18 | 22 | ATP synthase subunit beta                                            | Energy production and conversion | gi 576697808 gb EUB61347.1  |
| 31 | 93  | 0.17  | 18 | 25 | calpain-A                                                            | -                                | gi 576700942 gb EUB64462.1  |
| 32 | 28  | 0.18  | 18 | 29 | 14-3-3 protein zeta                                                  | Signal transduction              | gi 576698574 gb EUB62107.1  |
| 33 | 57  | 0.1   | 17 | 21 | UTP glucose 1 phosphate uridylyltransferase                          | Metabolism                       | gi 674569954 emb CDS16022.1 |
| 34 | 69  | 0.1   | 17 | 21 | four and A half lim domains                                          | -                                | gi 961439404 emb CUT98901.1 |
| 35 | 232 | 0.12  | 17 | 22 | collagen alpha 1(IV) chain                                           | -                                | gi 674561688 emb CDS24003.1 |
| 36 | 65  | 0.15  | 17 | 26 | NADP dependent malic enzyme                                          | Energy production and conversion | gi 674565192 emb CDS20746.1 |
| 37 | 62  | 0.15  | 16 | 22 | phosphoglucose isomerase                                             | Metabolism                       | gi 154369446 gb ABS81352.1  |
| 38 | 131 | 0.15  | 16 | 21 | fibrillar collagen chain FAp1 alpha                                  | -                                | gi 674568718 emb CDS17836.1 |
| 39 | 50  | 0.097 | 16 | 21 | Rab GDP dissociation inhibitor alpha                                 | Post-translational modification  | gi 576694030 gb EUB57627.1  |
| 40 | 162 | 0.097 | 16 | 18 | titin                                                                | Signal transduction              | gi 674567709 emb CDS16820.1 |
| 41 | 22  | 0.13  | 16 | 20 | myosin regulatory light chain                                        | Structural/cytoskeletal proteins | gi 124783553 gb ABN14929.1  |
| 42 | 190 | 0.063 | 15 | 15 | glycogen debranching enzyme                                          | Metabolism                       | gi 576699668 gb EUB63194.1  |
| 43 | 80  | 0.063 | 15 | 16 | glucan 14 alpha branching enzyme 1                                   | Metabolism                       | gi 674565637 emb CDS20187.1 |
| 44 | 27  | 0.56  | 14 | 22 | P29                                                                  | -                                | gi 558698068 gb AHA85391.1  |
| 45 | 115 | 0.078 | 14 | 16 | Filamin-A                                                            | Structural/cytoskeletal proteins | gi 576697079 gb EUB60625.1  |
| 46 | 65  | 0.13  | 14 | 21 | Phosphoglucomutase                                                   | Metabolism                       | gi 576695399 gb EUB58969.1  |
| 47 | 118 | 0.074 | 13 | 13 | calcium transporting atpase                                          | Metabolism                       | gi 674568220 emb CDS17335.1 |
| 48 | 93  | 0.097 | 13 | 18 | Basement membrane-specific heparan sulfate proteoglycan core protein | -                                | gi 576697991 gb EUB61528.1  |
| 49 | 50  | 0.093 | 13 | 17 | tubulin alpha chain                                                  | Structural/cytoskeletal proteins | gi 674570366 emb CDS16437.1 |
| 50 | 176 | 0.093 | 13 | 16 | abnormal embryogenesis family member emb 9                           | -                                | gi 674561689 emb CDS24004.1 |
| 51 | 61  | 0.074 | 13 | 15 | heat shock protein 60                                                | Post-translational modification  | gi 674580112 emb CDS35950.1 |
| 52 | 127 | 0.13  | 13 | 20 | Collagen alpha-2(I) chain                                            | -                                | gi 576700155 gb EUB63678.1  |
| 53 | 34  | 0.089 | 13 | 17 | atp:adp antiporter                                                   | -                                | gi 961439544 emb CUT99040.1 |
| 54 | 71  | 0.089 | 13 | 16 | Transketolase                                                        | Metabolism                       | gi 576691476 gb EUB55174.1  |
| 55 | 83  | 0.082 | 13 | 15 | Threonyl tRNA synthetase C                                           | Transcription                    | gi 674577779 emb CDS36622.1 |
| 56 | 34  | 0.11  | 13 | 15 | aldo keto reductase family 1 member B4                               | Function unknown                 | gi 674266307 emb CDI97754.1 |
| 57 | 89  | 0.071 | 13 | 14 | 6-phosphofructokinase                                                | Metabolism                       | gi 576694014 gb EUB57612.1  |
| 58 | 17  | 0.25  | 12 | 19 | Myosin essential light chain, striated adductor muscle               | Structural/cytoskeletal proteins | gi 576700259 gb EUB63782.1  |
| 59 | 114 | 0.067 | 12 | 13 | Ubiquitin-like modifier-activating enzyme                            | Metabolism                       | gi 576696184 gb EUB59741.1  |
| 60 | 66  | 0.063 | 12 | 14 | NADP-dependent malic enzyme                                          | Energy production and conversion | gi 576699687 gb EUB63213.1  |
| 61 | 42  | 0.11  | 12 | 16 | Phosphoglycerate kinase                                              | Metabolism                       | gi 576695835 gb EUB59398.1  |

|    |     |       |    |    |                                                          |                                  |                             |
|----|-----|-------|----|----|----------------------------------------------------------|----------------------------------|-----------------------------|
| 62 | 99  | 0.12  | 12 | 16 | elongation factor 2                                      | Transcription                    | gi 674570164 emb CDS16232.1 |
| 63 | 130 | 0.082 | 12 | 15 | filamin                                                  | -                                | gi 961440428 emb CDS40988.2 |
| 64 | 60  | 0.067 | 12 | 15 | glucose 6 phosphate 1 dehydrogenase                      | Metabolism                       | gi 674564077 emb CDS21761.1 |
| 65 | 42  | 0.089 | 12 | 17 | actin modulator protein [Taenia asiatica]                | -                                | gi 124783834 gb ABN14949.1  |
| 66 | 123 | 0.12  | 11 | 16 | collagen type i ii iii v xi alpha                        | -                                | gi 674563099 emb CDS22734.1 |
| 67 | 54  | 0.15  | 11 | 16 | trypsin-like protein                                     | Post-translational modification  | gi 311335041 gb ADP89566.1  |
| 68 | 111 | 0.063 | 11 | 13 | hemicentin 1                                             | -                                | gi 674576560 emb CDS36996.1 |
| 69 | 343 | 0.052 | 11 | 12 | WD repeat-containing protein                             | Function unknown                 | gi 576693505 gb EUB57116.1  |
| 70 | 48  | 0.063 | 11 | 13 | Adenylosuccinate synthetase isozyme                      | Metabolism                       | gi 576698414 gb EUB61948.1  |
| 71 | 46  | 0.063 | 11 | 15 | 2 amino 3 ketobutyrate coenzyme A ligase                 | Metabolism                       | gi 674266918 emb CDI97306.1 |
| 72 | 95  | 0.14  | 11 | 19 | fasciclin-1                                              | -                                | gi 576902497 gb AHH45014.1  |
| 73 | 33  | 0.067 | 11 | 12 | Succinate dehydrogenase [ubiquinone] iron-sulfur subunit | Energy production and conversion | gi 576692886 gb EUB56517.1  |
| 74 | 36  | 0.17  | 11 | 17 | glyceraldehyde-3-phosphate dehydrogenase                 | Metabolism                       | gi 149364041 gb ABR24229.1  |
| 75 | 85  | 0.059 | 11 | 12 | calpain                                                  | -                                | gi 674574770 emb CDS39654.1 |
| 76 | 50  | 0.074 | 11 | 13 | Tubulin beta-2 chain                                     | Structural/cytoskeletal proteins | gi 29337144 sp Q9NFZ6.1     |
| 77 | 52  | 0.074 | 11 | 12 | adenosylhomocysteinase                                   | Metabolism                       | gi 674563544 emb CDS21893.1 |
| 78 | 50  | 0.082 | 11 | 15 | cat eye syndrome critical region protein 5               | Metabolism                       | gi 674569255 emb CDS15318.1 |
| 79 | 80  | 0.067 | 11 | 14 | glycogen synthase                                        | Structural/cytoskeletal proteins | gi 674572158 emb CDS42583.1 |
| 80 | 18  | 0.26  | 10 | 21 | cyclophilin                                              | Post-translational modification  | gi 589812132 gb AHL20246.1  |
| 81 | 39  | 0.071 | 10 | 14 | Pyruvate dehydrogenase E1 component subunit beta         | Energy production and conversion | gi 576699464 gb EUB62991.1  |
| 82 | 13  | 0.093 | 10 | 12 | transforming growth factor beta 1 induced                | -                                | gi 961440199 emb CDI97591.2 |
| 83 | 22  | 0.2   | 10 | 15 | 2-cys peroxiredoxin                                      | Post-translational modification  | gi 223403612 gb ACM89281.1  |
| 84 | 62  | 0.093 | 10 | 12 | fumarate hydratase class I                               | Energy production and conversion | gi 674565797 emb CDS20347.1 |
| 85 | 21  | 0.11  | 10 | 13 | Myophilin                                                | Structural/cytoskeletal proteins | gi 576693412 gb EUB57026.1  |
| 86 | 45  | 0.082 | 10 | 14 | Ndr                                                      | -                                | gi 674572505 emb CDS42931.1 |
| 87 | 75  | 0.067 | 10 | 11 | Arginyl-tRNA synthetase, cytoplasmic                     | Transcription                    | gi 576694953 gb EUB58531.1  |
| 88 | 32  | 0.052 | 10 | 11 | tropomyosin 2 high molecular weight isoform              | -                                | gi 311992220 gb ADQ26722.1  |
| 89 | 88  | 0.033 | 9  | 9  | transitional endoplasmic reticulum atpase                | Post-translational modification  | gi 674566315 emb CDS19413.1 |
| 90 | 69  | 0.048 | 9  | 11 | actin interacting protein 1                              | Function unknown                 | gi 674571818 emb CDS42236.1 |
| 91 | 39  | 0.063 | 9  | 14 | guanine nucleotide binding protein subunit               | Function unknown                 | gi 674265669 emb CDI98172.1 |
| 92 | 46  | 0.086 | 9  | 12 | hypothetical transcript [Hymenolepis microstoma]         | -                                | gi 961496852 emb CUU99433.1 |
| 93 | 17  | 0.067 | 9  | 11 | Cofilin/actin-depolymerizing factor                      | -                                | gi 576697710 gb EUB61250.1  |

|     |     |       |   |    |                                                             |                                  |                             |
|-----|-----|-------|---|----|-------------------------------------------------------------|----------------------------------|-----------------------------|
| 94  | 152 | 0.063 | 9 | 11 | Peroxidasin                                                 | Function unknown                 | gi 576695249 gb EUB58822.1  |
| 95  | 67  | 0.059 | 9 | 10 | glycogen phosphorylase                                      | Metabolism                       | gi 674566586 emb CDS19686.1 |
| 96  | 31  | 0.041 | 9 | 11 | Four and a half LIM domains-containing<br>nrotein           | -                                | gi 576696870 gb EUB60419.1  |
| 97  | 26  | 0.071 | 9 | 12 | Triosephosphate isomerase                                   | Metabolism                       | gi 38258647 sp Q9GTX8.1     |
| 98  | 14  | 0.063 | 9 | 12 | Four and a half LIM domains-containing<br>protein           | -                                | gi 576697637 gb EUB61178.1  |
| 99  | 29  | 0.074 | 9 | 13 | phosphoglycerate mutase                                     | Metabolism                       | gi 674573499 emb CDS40416.1 |
| 100 | 70  | 0.048 | 9 | 10 | heat shock protein 70                                       | Post-translational modification  | gi 674568757 emb CDS17875.1 |
| 101 | 192 | 0.052 | 9 | 11 | putative ankyrin 2,3/unc44 Schistosoma<br>mansoni]          | Function unknown                 | gi 353232760 emb CCD80115.1 |
| 102 | 31  | 0.052 | 8 | 10 | Actin-1                                                     | Structural/cytoskeletal proteins | gi 576692431 gb EUB56079.1  |
| 103 | 50  | 0.063 | 8 | 11 | calponin-like protein                                       | Structural/cytoskeletal proteins | gi 124784064 gb ABN14962.1  |
| 104 | 35  | 0.11  | 8 | 12 | lactate dehydrogenase A                                     | Energy production and conversion | gi 318054471 gb ADV35656.1  |
| 105 | 232 | 0.033 | 8 | 8  | myosin heavy chain non muscle                               | Structural/cytoskeletal proteins | gi 674566383 emb CDS19483.1 |
| 106 | 43  | 0.033 | 8 | 9  | Pyruvate dehydrogenase E1 component<br>subunit alpha type I | Energy production and conversion | gi 576694194 gb EUB57787.1  |
| 107 | 29  | 0.037 | 8 | 8  | 14-3-3 protein zeta                                         | Signal transduction              | gi 576698383 gb EUB61917.1  |
| 108 | 12  | 0.13  | 8 | 16 | tegumental protein                                          | -                                | gi 60459970 gb AAX20156.1   |
| 109 | 50  | 0.052 | 8 | 10 | dihydrolipoamide dehydrogenase                              | Energy production and conversion | gi 674570213 emb CDS16281.1 |
| 110 | 165 | 0.074 | 8 | 11 | collagen type XI alpha 2                                    | -                                | gi 674564565 emb CDS20882.1 |
| 111 | 38  | 0.063 | 8 | 10 | Annexin A8                                                  | -                                | gi 576701205 gb EUB64725.1  |
| 112 | 58  | 0.052 | 8 | 10 | glutamate dehydrogenase                                     | Metabolism                       | gi 961439347 emb CUT98844.1 |
| 113 | 35  | 0.037 | 8 | 8  | mitochondrial phosphate carrier protein<br>precursor        | -                                | gi 124782844 gb ABN14885.1  |
| 114 | 104 | 0.037 | 7 | 8  | Alpha-actinin, sarcomeric                                   | Structural/cytoskeletal proteins | gi 576699978 gb EUB63502.1  |
| 115 | 42  | 0.089 | 7 | 11 | Beta-ureidopropionase                                       | Function unknown                 | gi 576700488 gb EUB64010.1  |
| 116 | 135 | 0.026 | 7 | 7  | importin 5                                                  | -                                | gi 674267405 emb CDI96909.1 |
| 117 | 128 | 0.026 | 7 | 7  | Tetracycline resistance leader peptide TetL                 | Metabolism                       | gi 674580117 emb CDS35955.1 |
| 118 | 32  | 0.041 | 7 | 8  | prohibitin                                                  | Post-translational modification  | gi 674576684 emb CDS37121.1 |
| 119 | 49  | 0.059 | 7 | 9  | elongation factor 1 alpha                                   | Transcription                    | gi 815798391 gb AKE48498.1  |
| 120 | 29  | 0.048 | 7 | 8  | 14-3-3 protein zeta                                         | Signal transduction              | gi 576699818 gb EUB63343.1  |
| 121 | 42  | 0.074 | 7 | 11 | Actin, cytoplasmic 2                                        | Structural/cytoskeletal proteins | gi 576693212 gb EUB56832.1  |
| 122 | 63  | 0.041 | 7 | 8  | NADP dependent malic enzyme                                 | Energy production and conversion | gi 674562690 emb CDS22946.1 |
| 123 | 37  | 0.052 | 7 | 8  | hemicentin 1                                                | -                                | gi 674576560 emb CDS36996.1 |

|     |    |       |   |    |                                                                                   |                                  |                                 |
|-----|----|-------|---|----|-----------------------------------------------------------------------------------|----------------------------------|---------------------------------|
| 124 | 42 | 0.033 | 7 | 8  | cAMP-dependent protein kinase type II regulatory subunit                          | Signal transduction              | gi 576701554 gb EUB65073.1      |
| 125 | 48 | 0.048 | 7 | 7  | Dihydrolipoyllysine-residue acetyltransferase component of pyruvate dehydrogenase | Energy production and conversion | gi 576691716 gb EUB55398.1      |
| 126 | 66 | 0.086 | 6 | 11 | fasciclin-2                                                                       | -                                | gi 576902499 gb AHH45015.1      |
| 127 | 60 | 0.022 | 6 | 6  | T complex protein 1 subunit alpha                                                 | Post-translational modification  | gi 674573749 emb CDS40669.1     |
| 128 | 97 | 0.03  | 6 | 6  | dynamain                                                                          | Function unknown                 | gi 674266904 emb CDI97292.1     |
| 129 | 35 | 0.03  | 6 | 7  | SH2 motif                                                                         | -                                | gi 674563259 emb CDS22222.1     |
| 130 | 57 | 0.022 | 6 | 6  | T-complex protein 1 subunit delta                                                 | Post-translational modification  | gi 576700958 gb EUB64478.1      |
| 131 | 26 | 0.12  | 6 | 10 | glutathione S-transferase                                                         | Post-translational modification  | gi 21591409 gb AAM64045.1       |
| 132 | 16 | 0.033 | 6 | 6  | Actin-depolymerizing factor 2                                                     | -                                | gi 576697711 gb EUB61251.1      |
| 133 | 30 | 0.033 | 6 | 8  | thymidine phosphorylase                                                           | Metabolism                       | gi 961440116 emb CUT99611.1     |
| 134 | 11 | 0.093 | 6 | 12 | dynein light chain                                                                | -                                | gi 29467010 dbj BAC66949.1      |
| 135 | 33 | 0.052 | 6 | 9  | Calcium binding protein                                                           | Structural/cytoskeletal proteins | gi 674562291 emb CDS23332.1     |
| 136 | 36 | 0.056 | 6 | 8  | small heat-shock protein                                                          | -                                | gi 21665905 emb CAD36617.1      |
| 137 | 32 | 0.03  | 6 | 7  | Mitochondrial dicarboxylate carrier                                               | -                                | gi 576692289 gb EUB55943.1      |
| 138 | 62 | 0.037 | 6 | 7  | Asparaginyl-tRNA synthetase, cytoplasmic                                          | Transcription                    | gi 576690884 gb EUB54629.1      |
| 139 | 18 | 0.033 | 6 | 7  | Ubiquitin-conjugating enzyme E2 N                                                 | Post-translational modification  | gi 576696369 gb EUB59924.1      |
| 140 | 20 | 0.041 | 6 | 7  | glycogen phosphorylase                                                            | Metabolism                       | gi 674566587 emb CDS19687.1     |
| 141 | 30 | 0.074 | 6 | 9  | purine nucleoside phosphorylase                                                   | Metabolism                       | gi 674567224 emb CDS18572.1     |
| 142 | 27 | 0.03  | 6 | 6  | subfamily T1A non peptidase ue                                                    | Post-translational modification  | gi 674563031 emb CDS22665.1     |
| 143 | 42 | 0.022 | 6 | 6  | casein kinase ii subunit alpha                                                    | Signal transduction              | gi 674576896 emb CDS37336.1     |
| 144 | 26 | 0.03  | 6 | 7  | thioredoxin dependent peroxide reductase                                          | Post-translational modification  | gi 674561357 emb CDS24295.1     |
| 145 | 11 | 0.041 | 6 | 7  | histone H3                                                                        | Transcription                    | gi 602727727 ref XP_007449308.1 |
| 146 | 22 | 0.041 | 6 | 8  | adenylate kinase                                                                  | Metabolism                       | gi 674563965 emb CDS21649.1     |
| 147 | 58 | 0.033 | 6 | 8  | chaperonin containing TCP1 subunit 2 beta                                         | Post-translational modification  | gi 674574995 emb CDS39497.1     |
| 148 | 65 | 0.033 | 6 | 6  | dihydropyrimidinase                                                               | Metabolism                       | gi 674567717 emb CDS16828.1     |
| 149 | 28 | 0.045 | 6 | 8  | 3 oxoacyl acyl carrier protein reductase                                          | Metabolism                       | gi 674573436 emb CDS40352.1     |
| 150 | 28 | 0.03  | 6 | 7  | Proteasome subunit alpha type-3                                                   | Post-translational modification  | gi 576697420 gb EUB60963.1      |
| 151 | 44 | 0.03  | 5 | 6  | DnaJ subfamily A member                                                           | Post-translational modification  | gi 576693390 gb EUB57005.1      |
| 152 | 80 | 0.045 | 5 | 7  | Titin                                                                             | -                                | gi 576695343 gb EUB58914.1      |
| 153 | 82 | 0.019 | 5 | 5  | FERM domain-containing protein 3                                                  | -                                | gi 576701126 gb EUB64646.1      |
| 154 | 68 | 0.041 | 5 | 6  | H17g protein, tegumental antigen                                                  | -                                | gi 34368418 emb CAE46111.1      |
| 155 | 35 | 0.033 | 5 | 6  | Putative deoxyribose-phosphate aldolase                                           | Metabolism                       | gi 576695900 gb EUB59462.1      |
| 156 | 75 | 0.022 | 5 | 5  | thioredoxin glutathione reductase                                                 | Energy production and conversion | gi 29825896 gb AAN63052.1       |

|     |     |       |   |   |                                                                   |                                  |                             |
|-----|-----|-------|---|---|-------------------------------------------------------------------|----------------------------------|-----------------------------|
| 157 | 59  | 0.026 | 5 | 6 | T-complex protein 1 subunit gamma                                 | Post-translational modification  | gi 674570231 emb CDS16299.1 |
| 158 | 355 | 0.019 | 5 | 5 | Titin                                                             | -                                | gi 576698310 gb EUB61845.1  |
| 159 | 37  | 0.03  | 5 | 6 | Calumenin-B                                                       | -                                | gi 576701509 gb EUB65028.1  |
| 160 | 115 | 0.03  | 5 | 5 | alpha actinin sarcomeric                                          | Structural/cytoskeletal proteins | gi 674562490 emb CDS23200.1 |
| 161 | 57  | 0.019 | 5 | 5 | aminopeptidase N                                                  | Metabolism                       | gi 674572490 emb CDS42915.1 |
| 162 | 40  | 0.033 | 5 | 6 | Succinyl-CoA ligase GDP-formingJ subunit alpha                    | Energy production and conversion | gi 576693072 gb EUB56696.1  |
| 163 | 45  | 0.033 | 5 | 6 | Aspartate aminotransferase                                        | Metabolism                       | gi 576693792 gb EUB57395.1  |
| 164 | 14  | 0.048 | 5 | 7 | histone H2B                                                       | -                                | gi 674577890 emb CDS36286.1 |
| 165 | 60  | 0.022 | 5 | 5 | T-complex protein 1 subunit theta                                 | Post-translational modification  | gi 576696899 gb EUB60447.1  |
| 166 | 30  | 0.026 | 5 | 5 | phosphatase 2a inhibitor i2pp2a                                   | -                                | gi 674566256 emb CDS19354.1 |
| 167 | 26  | 0.033 | 5 | 6 | Proteasome subunit alpha type-2                                   | Post-translational modification  | gi 576695969 gb EUB59529.1  |
| 168 | 42  | 0.033 | 5 | 7 | heat shock protein 71 protein                                     | Post-translational modification  | gi 674560532 emb CDS25069.1 |
| 169 | 35  | 0.037 | 5 | 6 | GDP L fucose synthase                                             | Metabolism                       | gi 674577076 emb CDS37519.1 |
| 170 | 309 | 0.019 | 5 | 5 | Titin                                                             | Signal transduction              | gi 576698310 gb EUB61845.1  |
| 171 | 51  | 0.033 | 5 | 7 | Innexin unc-9                                                     | -                                | gi 576699141 gb EUB62670.1  |
| 172 | 72  | 0.026 | 5 | 6 | glucose-regulated protein mitochondrial processing peptidase beta | Post-translational modification  | gi 576694898 gb EUB58477.1  |
| 173 | 53  | 0.019 | 5 | 5 | subunit                                                           | Function unknown                 | gi 674266979 emb CDI97367.1 |
| 174 | 36  | 0.022 | 5 | 5 | lactate dehydrogenase B                                           | Energy production and conversion | gi 318054473 gb ADV35657.1  |
| 175 | 21  | 0.037 | 5 | 7 | PDZ and LIM domain protein                                        | -                                | gi 576695629 gb EUB59195.1  |
| 176 | 41  | 0.041 | 5 | 6 | annexin B2                                                        | -                                | gi 62868630 gb AA17503.1    |
| 177 | 11  | 0.086 | 5 | 8 | Dynein light chain 2                                              | -                                | gi 576691998 gb EUB55665.1  |
| 178 | 342 | 0.03  | 5 | 5 | Lipid transport protein N terminal                                | -                                | gi 674562598 emb CDS22854.1 |
| 179 | 15  | 0.022 | 5 | 5 | cytosolic fatty acid binding protein                              | -                                | gi 82412213 gb ABB76135.1   |
| 180 | 163 | 0.022 | 5 | 5 | Lethal(2) giant larvae protein                                    | -                                | gi 576692591 gb EUB56232.1  |
| 181 | 57  | 0.026 | 5 | 6 | lysyl oxidase                                                     | -                                | gi 674265829 emb CDI98333.1 |
| 182 | 88  | 0.03  | 5 | 6 | n acetylated alpha linked acidic dipeptidase 2                    | -                                | gi 674574508 emb CDS41437.1 |
| 183 | 21  | 0.026 | 5 | 5 | ADP-ribosylation factor                                           | Function unknown                 | gi 576696292 gb EUB59848.1  |
| 184 | 13  | 0.048 | 5 | 7 | transforming growth factor beta 1 induced                         | -                                | gi 961440199 emb CDI97591.2 |
| 185 | 29  | 0.019 | 5 | 5 | peptidase inhibitor 16                                            | -                                | gi 674573188 emb CDS40101.1 |
| 186 | 45  | 0.019 | 4 | 4 | eukaryotic initiation factor 4A                                   | Transcription                    | gi 674561290 emb CDS24381.1 |
| 187 | 31  | 0.033 | 4 | 5 | carbonyl reductase 1                                              | Metabolism                       | gi 674266977 emb CDI97365.1 |
| 188 | 14  | 0.026 | 4 | 4 | histone H2A                                                       | Transcription                    | gi 674577655 emb CDS36693.1 |
| 189 | 11  | 0.026 | 4 | 7 | Dynein light chain LC6, flagellar outer arm                       | -                                | gi 576691990 gb EUB55657.1  |

|     |     |       |   |   |                                                |                                  |                             |
|-----|-----|-------|---|---|------------------------------------------------|----------------------------------|-----------------------------|
| 190 | 40  | 0.041 | 4 | 7 | calponin-like protein <i>Taenia asiatica</i> ] | Structural/cytoskeletal proteins | gi 124783983 gb ABN14959.1  |
| 191 | 48  | 0.019 | 4 | 5 | hypothetical protein EGR_01765                 | -                                | gi 576699749 gb EUB63274.1  |
| 192 | 41  | 0.037 | 4 | 7 | Serpin B9                                      | Post-translational modification  | gi 576696703 gb EUB60253.1  |
| 193 | 19  | 0.022 | 4 | 5 | titin                                          | -                                | gi 674566990 emb CDS18337.1 |
| 194 | 50  | 0.019 | 4 | 4 | Tubulin beta-1 chain                           | Structural/cytoskeletal proteins | gi 576697601 gb EUB61142.1  |
| 195 | 16  | 0.03  | 4 | 5 | Chain A                                        | Metabolism                       | gi 347948498 pdb 3MND A     |
| 196 | 41  | 0.022 | 4 | 5 | Calcium-binding protein 39-like protein        | -                                | gi 576697595 gb EUB61136.1  |
| 197 | 36  | 0.037 | 4 | 5 | transaldolase                                  | Metabolism                       | gi 674560699 emb CDS24943.1 |
| 198 | 42  | 0.067 | 4 | 7 | Severin                                        | -                                | gi 576693443 gb EUB57056.1  |
| 199 | 36  | 0.022 | 4 | 5 | Annexin A13                                    | -                                | gi 576701204 gb EUB64724.1  |
| 200 | 179 | 0.015 | 4 | 4 | Ankyrin-2                                      | Function unknown                 | gi 576699604 gb EUB63130.1  |
| 201 | 31  | 0.022 | 4 | 4 | prohibitin protein WPH                         | Post-translational modification  | gi 674574612 emb CDS39840.1 |
| 202 | 36  | 0.026 | 4 | 5 | serine:threonine protein phosphatase 2A        | Signal transduction              | gi 674570693 emb CDS43313.1 |
| 203 | 195 | 0.015 | 4 | 4 | Muscle M-line assembly protein unc-89          | -                                | gi 576698306 gb EUB61841.1  |
| 204 | 20  | 0.045 | 4 | 5 | protein DJ 1                                   | Function unknown                 | gi 674266694 emb CDI97572.1 |
| 205 | 15  | 0.022 | 4 | 5 | Ubiquitin                                      | Post-translational modification  | gi 576701155 gb EUB64675.1  |
| 206 | 11  | 0.063 | 4 | 9 | expressed protein                              | -                                | gi 674574827 emb CDS39329.1 |
| 207 | 27  | 0.037 | 4 | 5 | ornithine aminotransferase                     | Metabolism                       | gi 674572180 emb CDS42605.1 |
| 208 | 36  | 0.033 | 4 | 6 | NADH-cytochrome b5 reductase 3                 | Metabolism                       | gi 576700067 gb EUB63591.1  |
| 209 | 29  | 0.026 | 4 | 6 | sj ts4 protein                                 | -                                | gi 674577718 emb CDS36766.1 |
| 210 | 31  | 0.019 | 4 | 4 | Microtubule associated protein RP:EB family    | Structural/cytoskeletal proteins | gi 961439806 emb CUT99302.1 |
| 211 | 54  | 0.015 | 4 | 4 | tubulin alpha 1C chain                         | Structural/cytoskeletal proteins | gi 674577457 emb CDS36904.1 |
| 212 | 29  | 0.019 | 4 | 5 | putative cyclin-H                              | Post-translational modification  | gi 576697794 gb EUB61333.1  |
| 213 | 30  | 0.022 | 4 | 5 | Proteasome subunit alpha type-7-like protein   | Post-translational modification  | gi 576696890 gb EUB60438.1  |
| 214 | 104 | 0.015 | 4 | 4 | multivalent antigen sj tpi                     | -                                | gi 674565534 emb CDS20084.1 |
| 215 | 218 | 0.019 | 4 | 4 | ankyrin 23:unc44                               | Function unknown                 | gi 674566273 emb CDS19371.1 |
| 216 | 25  | 0.052 | 4 | 7 | glutathione transferase                        | Post-translational modification  | gi 1004227 emb CAA59739.1   |
| 217 | 9   | 0.026 | 4 | 5 | LIM zinc bindingdomain containing protein      | -                                | gi 674576398 emb CDS38102.1 |
| 218 | 15  | 0.026 | 4 | 4 | histone                                        | Transcription                    | gi 674569431 emb CDS15495.1 |
| 219 | 12  | 0.033 | 4 | 5 | thioredoxin-1                                  | Post-translational modification  | gi 724471034 gb AIY26017.1  |
| 220 | 18  | 0.03  | 4 | 4 | Tubulin polymerization-promoting protein       | -                                | gi 576692624 gb EUB56264.1  |
| 221 | 32  | 0.015 | 4 | 4 | GDP-mannose 4,6 dehydratase                    | Structural/cytoskeletal proteins | gi 576691516 gb EUB55210.1  |
| 222 | 52  | 0.019 | 4 | 4 | Aldehyde dehydrogenase family 1 member A3      | Energy production and conversion | gi 576693855 gb EUB57457.1  |

|     |     |       |   |   |                                                 |                                  |                             |
|-----|-----|-------|---|---|-------------------------------------------------|----------------------------------|-----------------------------|
| 223 | 52  | 0.015 | 4 | 4 | NADH dehydrogenase ubiquinone flavoprotein 1    | Energy production and conversion | gi 674578154 emb CDS36554.1 |
| 224 | 20  | 0.03  | 4 | 7 | cysteine and glycine rich protein 1             | -                                | gi 674574369 emb CDS41298.1 |
| 225 | 52  | 0.019 | 4 | 5 | hexokinase                                      | Metabolism                       | gi 674576035 emb CDS38325.1 |
| 226 | 66  | 0.019 | 4 | 4 | Phosphoacetylglucosamine mutase                 | Metabolism                       | gi 576698281 gb EUB61816.1  |
| 227 | 42  | 0.011 | 3 | 3 | beta centractin                                 | Structural/cytoskeletal proteins | gi 674568090 emb CDS17204.1 |
| 228 | 38  | 0.015 | 3 | 4 | 26S proteasome non ATPase regulatory subunit 7  | Function unknown                 | gi 674574868 emb CDS39370.1 |
| 229 | 19  | 0.015 | 3 | 4 | Calmodulin                                      | Structural/cytoskeletal proteins | gi 576691891 gb EUB55563.1  |
| 230 | 21  | 0.015 | 3 | 3 | ribosomal protein L11                           | Transcription                    | gi 674266506 emb CDI97959.1 |
| 231 | 39  | 0.015 | 3 | 3 | Guanine nucleotide-binding protein subunit beta | Function unknown                 | gi 576698293 gb EUB61828.1  |
| 232 | 25  | 0.011 | 3 | 3 | fascin 2                                        | -                                | gi 674564399 emb CDS21401.1 |
| 233 | 34  | 0.019 | 3 | 4 | 2-oxoglutarate/malate carrier protein           | -                                | gi 576692217 gb EUB55875.1  |
| 234 | 49  | 0.011 | 3 | 3 | spliceosome rna helicase bat1                   | Transcription                    | gi 674564743 emb CDS21061.1 |
| 235 | 19  | 0.026 | 3 | 4 | aldo keto reductase family 1 member B4          | Function unknown                 | gi 674564193 emb CDS21191.1 |
| 236 | 56  | 0.019 | 3 | 3 | alanine aminotransferase 2                      | Metabolism                       | gi 674566348 emb CDS19447.1 |
| 237 | 25  | 0.011 | 3 | 3 | platelet activating factor acetylhydrolase IB   | -                                | gi 674267045 emb CDI97433.1 |
| 238 | 33  | 0.019 | 3 | 4 | inorganic pyrophosphatase                       | Energy production and conversion | gi 674577167 emb CDS37611.1 |
| 239 | 10  | 0.026 | 3 | 5 | Dynein light chain LC6, flagellar outer arm     | -                                | gi 576695376 gb EUB58946.1  |
| 240 | 47  | 0.015 | 3 | 3 | NADH dehydrogenase ubiquinone re 3 protein 1    | Energy production and conversion | gi 674568845 emb CDS17967.1 |
| 241 | 31  | 0.015 | 3 | 3 | adenylate cyclase 9                             | -                                | gi 674571922 emb CDS42344.1 |
| 242 | 21  | 0.011 | 3 | 3 | ras protein Rab 7a                              | Function unknown                 | gi 674266074 emb CDI98578.1 |
| 243 | 51  | 0.019 | 3 | 4 | Tubulin beta-3 chain                            | Structural/cytoskeletal proteins | gi 576697602 gb EUB61143.1  |
| 244 | 122 | 0.011 | 3 | 3 | Anoctamin-1                                     | -                                | gi 576691278 gb EUB54990.1  |
| 245 | 42  | 0.011 | 3 | 3 | NAD(P) transhydrogenase subunit alpha           | Energy production and conversion | gi 576694192 gb EUB57785.1  |
| 246 | 50  | 0.019 | 3 | 3 | Non-lysosomal glucosylceramidase                | Metabolism                       | gi 576694850 gb EUB58430.1  |
| 247 | 74  | 0.015 | 3 | 4 | hypothetical protein EGR_00474                  | -                                | gi 576701004 gb EUB64524.1  |
| 248 | 28  | 0.011 | 3 | 3 | NADH dehydrogenase ubiquinone iron sulfur       | Energy production and conversion | gi 961440051 emb CUT99546.1 |
| 249 | 57  | 0.011 | 3 | 3 | coronin 1C                                      | Function unknown                 | gi 674266210 emb CDI98717.1 |
| 250 | 61  | 0.019 | 3 | 5 | pyruvate kinase                                 | Metabolism                       | gi 674572621 emb CDS43052.1 |
| 251 | 53  | 0.011 | 3 | 3 | 4-hydroxybutyrate coenzyme A transferase        | Energy production and conversion | gi 576692646 gb EUB56285.1  |
| 252 | 53  | 0.015 | 3 | 3 | Cytochrome b c1 complex subunit 2               | Function unknown                 | gi 674562375 emb CDS23417.1 |
| 253 | 22  | 0.019 | 3 | 4 | rho gdp dissociation inhibitor                  | -                                | gi 674571096 emb CDS43731.1 |
| 254 | 24  | 0.03  | 3 | 3 | sigma-type glutathione S-transferase            | -                                | gi 225355240 gb ACN88552.1  |
| 255 | 20  | 0.015 | 3 | 4 | translationally controlled tumor protein        | -                                | gi 674267348 emb CDI96852.1 |
| 256 | 62  | 0.011 | 3 | 3 | glycerol kinase                                 | Energy production and conversion | gi 674266527 emb CDI97981.1 |



|     |     |       |   |   |                                                            |                                  |                             |
|-----|-----|-------|---|---|------------------------------------------------------------|----------------------------------|-----------------------------|
| 257 | 40  | 0.011 | 3 | 3 | stomatin protein 2                                         | Post-translational modification  | gi 674571420 emb CDS41834.1 |
| 258 | 21  | 0.011 | 3 | 3 | NADH dehydrogenase [ubiquinone] 1 alpha subcomplex subunit | -                                | gi 576695550 gb EUB59117.1  |
| 259 | 26  | 0.015 | 3 | 3 | Synaptic vesicle membrane protein VAT-1-like protein       | Energy production and conversion | gi 576698237 gb EUB61772.1  |
| 260 | 38  | 0.011 | 3 | 3 | alpha tocopherol transfer protein                          | -                                | gi 674562106 emb CDS23617.1 |
| 261 | 102 | 0.019 | 3 | 3 | Lysosomal alpha-glucosidase                                | Metabolism                       | gi 576693012 gb EUB56638.1  |
| 262 | 10  | 0.045 | 3 | 6 | Dynein light chain 1                                       | -                                | gi 576698380 gb EUB61914.1  |
| 263 | 54  | 0.011 | 3 | 3 | 6-phosphogluconate dehydrogenase                           | Metabolism                       | gi 576699896 gb EUB63420.1  |
| 264 | 63  | 0.011 | 3 | 3 | non lysosomal glucosylceramidase                           | Metabolism                       | gi 674570277 emb CDS16346.1 |
| 265 | 31  | 0.011 | 3 | 3 | fructose-1,6-phosphatase                                   | Metabolism                       | gi 338827796 gb AEJ15818.1  |
| 266 | 75  | 0.011 | 3 | 3 | ubiquitin protein ligase BRE1                              | Structural/cytoskeletal proteins | gi 674569884 emb CDS15952.1 |
| 267 | 58  | 0.015 | 3 | 3 | Aspartyl-tRNA synthetase, cytoplasmic                      | Transcription                    | gi 576701543 gb EUB65062.1  |
| 268 | 27  | 0.011 | 3 | 3 | Proteasome subunit alpha type-6                            | Post-translational modification  | gi 576694857 gb EUB58437.1  |
| 269 | 26  | 0.015 | 3 | 3 | 60S ribosomal protein L10a                                 | Transcription                    | gi 674569308 emb CDS15371.1 |
| 270 | 38  | 0.011 | 3 | 3 | aldo keto reductase family 1 member B4                     | Function unknown                 | gi 674576243 emb CDS37943.1 |
| 271 | 24  | 0.015 | 3 | 3 | ras protein rab 8b                                         | Function unknown                 | gi 674571909 emb CDS42331.1 |
| 272 | 59  | 0.015 | 3 | 3 | Synaptotagmin-14                                           | -                                | gi 576700387 gb EUB63909.1  |
| 273 | 36  | 0.015 | 3 | 3 | malate dehydrogenase                                       | Energy production and conversion | gi 674563046 emb CDS22680.1 |
| 274 | 9   | 0.022 | 3 | 4 | acyl coenzyme A binding protein                            | Metabolism                       | gi 674573492 emb CDS40408.1 |
| 275 | 323 | 0.011 | 3 | 3 | talin                                                      | -                                | gi 674561411 emb CDS24246.1 |
| 276 | 26  | 0.015 | 3 | 3 | Metallo-beta-lactamase domain-containing protein           | -                                | gi 576694466 gb EUB58053.1  |
| 277 | 61  | 0.011 | 3 | 3 | protein phosphatase 2a regulatory subunit                  | -                                | gi 674565771 emb CDS20321.1 |
| 278 | 31  | 0.015 | 3 | 3 | aldo keto reductase family 1 member B4                     | Function unknown                 | gi 674564192 emb CDS21190.1 |
| 279 | 33  | 0.022 | 3 | 4 | ATP synthase subunit gamma                                 | Energy production and conversion | gi 576697467 gb EUB61009.1  |
| 280 | 97  | 0.015 | 3 | 3 | Cysteinyl-tRNA synthetase, cytoplasmic                     | Transcription                    | gi 576701405 gb EUB64924.1  |
| 281 | 21  | 0.026 | 3 | 4 | tegumental protein                                         | -                                | gi 576695787 gb EUB59351.1  |
| 282 | 29  | 0.019 | 3 | 4 | SCO cytochrome oxidase deficient protein 1                 | Function unknown                 | gi 674565543 emb CDS20093.1 |
| 283 | 68  | 0.015 | 3 | 3 | nadp transhydrogenase                                      | Energy production and conversion | gi 674566810 emb CDS18157.1 |
| 284 | 59  | 0.011 | 3 | 3 | cytosolic purine 5' nucleotidase                           | -                                | gi 674562874 emb CDS22508.1 |
| 285 | 14  | 0.041 | 3 | 5 | Profilin allergen                                          | -                                | gi 674267056 emb CDI97444.1 |
| 286 | 83  | 0.015 | 3 | 3 | Dipeptidyl peptidase 3                                     | -                                | gi 576698676 gb EUB62208.1  |
| 287 | 30  | 0.015 | 3 | 3 | N(G),N(G)-dimethylarginine dimethylaminohydrolase          | Metabolism                       | gi 576699391 gb EUB62919.1  |

|     |     |        |   |   |                                                                          |                                  |                             |
|-----|-----|--------|---|---|--------------------------------------------------------------------------|----------------------------------|-----------------------------|
| 288 | 68  | 0.011  | 3 | 3 | lamin dm0                                                                | -                                | gi 674567902 emb CDS17015.1 |
| 289 | 42  | 0.011  | 3 | 3 | annexin                                                                  | -                                | gi 674266071 emb CDI98575.1 |
| 290 | 17  | 0.022  | 3 | 5 | ubiquitin conjugating enzyme                                             | Post-translational modification  | gi 532576613 gb AGT98656.1  |
| 291 | 24  | 0.0074 | 2 | 2 | 60S ribosomal protein L13a                                               | Transcription                    | gi 576699387 gb EUB62915.1  |
| 292 | 48  | 0.015  | 2 | 2 | Elongation factor 1-gamma                                                | Post-translational modification  | gi 576697550 gb EUB61092.1  |
| 293 | 42  | 0.0074 | 2 | 2 | Alpha-tocopherol transfer protein-like protein                           | -                                | gi 576695576 gb EUB59143.1  |
| 294 | 44  | 0.0074 | 2 | 2 | nardilysin, partial                                                      | Post-translational modification  | gi 674561072 emb CDS24623.1 |
| 295 | 23  | 0.0074 | 2 | 2 | 60S ribosomal protein L13                                                | Transcription                    | gi 576694227 gb EUB57819.1  |
| 296 | 35  | 0.0074 | 2 | 2 | mitochondrial glutamate carrier protein                                  | -                                | gi 555232805 emb CDI70107.1 |
| 297 | 29  | 0.0074 | 2 | 2 | tegumental protein                                                       | -                                | gi 576693059 gb EUB56683.1  |
| 298 | 27  | 0.0074 | 2 | 2 | aminoacylase 1                                                           | Metabolism                       | gi 674567544 emb CDS18900.1 |
| 299 | 75  | 0.0074 | 2 | 2 | Dolichyl-diphosphooligosaccharide--protein glycosyltransferase subunit 2 | -                                | gi 576692720 gb EUB56357.1  |
| 300 | 49  | 0.011  | 2 | 2 | galactokinase                                                            | Metabolism                       | gi 674565167 emb CDS20721.1 |
| 301 | 20  | 0.011  | 2 | 3 | FAD linked sulfhydryl oxidase ALR                                        | Post-translational modification  | gi 674570875 emb CDS43499.1 |
| 302 | 60  | 0.0074 | 2 | 2 | puromycin sensitive aminopeptidase                                       | Metabolism                       | gi 674560979 emb CDS24674.1 |
| 303 | 45  | 0.011  | 2 | 2 | actin protein 3B                                                         | Structural/cytoskeletal proteins | gi 674580528 emb CDS35468.1 |
| 304 | 47  | 0.011  | 2 | 3 | succinyl coenzyme A ligase ADP forming subunit beta                      | Energy production and conversion | gi 674576203 emb CDS37901.1 |
| 305 | 38  | 0.0074 | 2 | 2 | vesicle associated membrane protein vamp                                 | Signal transduction              | gi 674564989 emb CDS20538.1 |
| 306 | 47  | 0.0074 | 2 | 2 | Lysosomal aspartic protease                                              | -                                | gi 576694392 gb EUB57981.1  |
| 307 | 22  | 0.0074 | 2 | 2 | nascent polypeptide associated complex subunit                           | Transcription                    | gi 674571946 emb CDS42368.1 |
| 308 | 55  | 0.015  | 2 | 3 | Protein disulfide-isomerase                                              | Post-translational modification  | gi 576692553 gb EUB56196.1  |
| 309 | 82  | 0.0074 | 2 | 2 | procollagen lysine2 oxoglutarate 5 dioxygenase                           | -                                | gi 674576758 emb CDS37197.1 |
| 310 | 32  | 0.0074 | 2 | 2 | Transcriptional activator protein Pur-alpha                              | -                                | gi 576701516 gb EUB65035.1  |
| 311 | 41  | 0.011  | 2 | 3 | ribosomal protein L7-like protein Taenia asiatica]                       | Transcription                    | gi 124782929 gb ABN14890.1  |
| 312 | 17  | 0.011  | 2 | 2 | 60S ribosomal protein L27                                                | Transcription                    | gi 576692810 gb EUB56444.1  |
| 313 | 18  | 0.019  | 2 | 3 | Nucleoside diphosphate kinase A 2                                        | Metabolism                       | gi 576695995 gb EUB59555.1  |
| 314 | 193 | 0.0074 | 2 | 2 | intron binding protein aquarius                                          | Transcription                    | gi 674570162 emb CDS16230.1 |
| 315 | 180 | 0.0074 | 2 | 2 | collagen alpha 1(IV) chain Hymenolepis microstoma]                       | -                                | gi 674591161 emb CDS29935.1 |
| 316 | 13  | 0.011  | 2 | 3 | Calmodulin                                                               | Structural/cytoskeletal proteins | gi 576700576 gb EUB64098.1  |

|     |     |        |   |   |                                                                  |                                  |                             |
|-----|-----|--------|---|---|------------------------------------------------------------------|----------------------------------|-----------------------------|
| 317 | 94  | 0.0074 | 2 | 2 | Integrin beta-7                                                  | -                                | gi 576697707 gb EUB61247.1  |
| 318 | 51  | 0.0074 | 2 | 2 | dihydrolipoyllysine residue acetyltransferase                    | Energy production and conversion | gi 674566907 emb CDS18254.1 |
| 319 | 30  | 0.011  | 2 | 3 | hemicentin 1                                                     | -                                | gi 674576561 emb CDS36997.1 |
| 320 | 88  | 0.0074 | 2 | 2 | Protein transport protein Sec23A                                 | Signal transduction              | gi 576697713 gb EUB61253.1  |
| 321 | 14  | 0.011  | 2 | 2 | Four and a half LIM domains protein 3                            | -                                | gi 674266711 emb CDI97590.1 |
| 322 | 49  | 0.0074 | 2 | 2 | expressed protein                                                | -                                | gi 674561116 emb CDS24544.1 |
| 323 | 22  | 0.0074 | 2 | 2 | Proteasome subunit beta type-2                                   | Post-translational modification  | gi 576700475 gb EUB63997.1  |
| 324 | 35  | 0.0074 | 2 | 2 | actin related protein 2.3 complex subunit 1A.1B                  | Function unknown                 | gi 961439601 emb CUT99097.1 |
| 325 | 53  | 0.0074 | 2 | 2 | succinate semialdehyde dehydrogenase                             | Energy production and conversion | gi 674561217 emb CDS24488.1 |
| 326 | 32  | 0.0074 | 2 | 2 | Protein phosphatase 1 regulatory subunit                         | Function unknown                 | gi 576699343 gb EUB62871.1  |
| 327 | 10  | 0.011  | 2 | 2 | Antigen B                                                        | -                                | gi 576692423 gb EUB56071.1  |
| 328 | 29  | 0.0074 | 2 | 2 | Immunoglobulin domain containing protein                         | -                                | gi 674561326 emb CDS24349.1 |
| 329 | 67  | 0.0074 | 2 | 2 | Leukotriene A-4 hydrolase                                        | Metabolism                       | gi 576698893 gb EUB62423.1  |
| 330 | 16  | 0.015  | 2 | 2 | Thioredoxin                                                      | Post-translational modification  | gi 576693344 gb EUB56960.1  |
| 331 | 38  | 0.0074 | 2 | 2 | Serine/threonine-protein phosphatase PP1-gamma catalytic subunit | Signal transduction              | gi 576701522 gb EUB65041.1  |
| 332 | 531 | 0.011  | 2 | 2 | dynein heavy chain                                               | Structural/cytoskeletal proteins | gi 674569847 emb CDS15915.1 |
| 333 | 59  | 0.0074 | 2 | 2 | pleckstrin y domain containing family A                          | -                                | gi 674560993 emb CDS24688.1 |
| 334 | 22  | 0.0074 | 2 | 2 | expressed protein                                                | Transcription                    | gi 674562273 emb CDS23314.1 |
| 335 | 31  | 0.011  | 2 | 2 | Chloride intracellular channel protein 5                         | -                                | gi 576697068 gb EUB60614.1  |
| 336 | 19  | 0.0074 | 2 | 2 | Ubiquitin-conjugating enzyme E2                                  | Post-translational modification  | gi 576695523 gb EUB59091.1  |
| 337 | 33  | 0.0074 | 2 | 2 | LIN 24 Twenty four Like family member                            | -                                | gi 674266446 emb CDI97898.1 |
| 338 | 28  | 0.0074 | 2 | 2 | Ndr                                                              | -                                | gi 674571386 emb CDS41800.1 |
| 339 | 20  | 0.011  | 2 | 3 | glycogen phosphorylase                                           | Metabolism                       | gi 674577298 emb CDS37742.1 |
| 340 | 12  | 0.011  | 2 | 2 | FK506-binding protein-like protein                               | Post-translational modification  | gi 194324935 gb ACF49124.1  |
| 341 | 11  | 0.0074 | 2 | 2 | Dynein light chain 2, cytoplasmic                                | -                                | gi 576691997 gb EUB55664.1  |
| 342 | 70  | 0.0074 | 2 | 2 | lamin                                                            | -                                | gi 674571622 emb CDS42039.1 |
| 343 | 16  | 0.011  | 2 | 2 | Calcium binding protein                                          | Structural/cytoskeletal proteins | gi 674576918 emb CDS37358.1 |
| 344 | 34  | 0.0074 | 2 | 2 | Fascin-2                                                         | -                                | gi 576691449 gb EUB55148.1  |
| 345 | 69  | 0.0074 | 2 | 2 | fimbrin <i>Taenia asiatica</i> ]                                 | Structural/cytoskeletal proteins | gi 124783291 gb ABN14919.1  |
| 346 | 44  | 0.011  | 2 | 2 | GTP binding protein CG1354                                       | Transcription                    | gi 674567571 emb CDS18927.1 |
| 347 | 80  | 0.0074 | 2 | 2 | Armadillo type fold                                              | -                                | gi 674265874 emb CDI98378.1 |
| 348 | 121 | 0.0074 | 2 | 2 | dihydropyrimidine dehydrogenase NADP                             | Metabolism                       | gi 674568815 emb CDS17936.1 |

|     |     |        |   |   |                                                           |                                  |                             |
|-----|-----|--------|---|---|-----------------------------------------------------------|----------------------------------|-----------------------------|
| 349 | 110 | 0.0074 | 2 | 2 | SNase domain containing protein                           | Transcription                    | gi 674568828 emb CDS17949.1 |
| 350 | 42  | 0.0074 | 2 | 2 | Erlin-1                                                   | Post-translational modification  | gi 576691975 gb EUB55643.1  |
| 351 | 74  | 0.011  | 2 | 2 | von Willebrand factor A domain-containing protein 5A      | Function unknown                 | gi 576695423 gb EUB58992.1  |
| 352 | 40  | 0.0074 | 2 | 2 | mitochondrial trans 2 enoyl coenzyme A reductase          | Energy production and conversion | gi 674561473 emb CDS24193.1 |
| 353 | 8   | 0.011  | 2 | 3 | immunogenic protein Ts76                                  | -                                | gi 7339853 gb AAF60976.1    |
| 354 | 38  | 0.0074 | 2 | 2 | dnaJ subfamily B                                          | Post-translational modification  | gi 961439579 emb CUT99075.1 |
| 355 | 17  | 0.011  | 2 | 3 | spectrin alpha actinin Hymenolepis microstomal            | Structural/cytoskeletal proteins | gi 674591524 emb CDS29622.1 |
| 356 | 39  | 0.015  | 2 | 3 | annexin                                                   | -                                | gi 674565627 emb CDS20177.1 |
| 357 | 50  | 0.011  | 2 | 2 | NADH ubiquinone oxidoreductase 42 subunit                 | -                                | gi 674577975 emb CDS36372.1 |
| 358 | 51  | 0.0074 | 2 | 2 | plastin 2                                                 | Structural/cytoskeletal proteins | gi 674573167 emb CDS40079.1 |
| 359 | 24  | 0.0074 | 2 | 2 | 60S ribosomal protein L15                                 | Transcription                    | gi 576696309 gb EUB59865.1  |
| 360 | 75  | 0.0074 | 2 | 2 | Metallophosphoesterase                                    | Post-translational modification  | gi 576694196 gb EUB57789.1  |
| 361 | 13  | 0.0074 | 2 | 2 | 60S ribosomal protein L23                                 | Transcription                    | gi 576699448 gb EUB62975.1  |
| 362 | 25  | 0.011  | 2 | 3 | Myophilin                                                 | Structural/cytoskeletal proteins | gi 961439407 emb CUT98904.1 |
| 363 | 26  | 0.011  | 2 | 3 | proteasome prosome macropain subunit beta                 | Post-translational modification  | gi 674565758 emb CDS20308.1 |
| 364 | 73  | 0.0074 | 2 | 2 | alpha adducin                                             | Metabolism                       | gi 674266887 emb CDI97275.1 |
| 365 | 17  | 0.015  | 2 | 2 | NADH dehydrogenase [ubiquinone] 1 beta subcomplex subunit | -                                | gi 576697957 gb EUB61494.1  |
| 366 | 8   | 0.0074 | 2 | 2 | 40S ribosomal protein S28                                 | Transcription                    | gi 576698176 gb EUB61712.1  |
| 367 | 34  | 0.015  | 2 | 2 | mitochondrial carrier 2                                   | -                                | gi 674566620 emb CDS19720.1 |
| 368 | 38  | 0.0074 | 2 | 2 | Dehydrogenase:reductase SDR family                        | Metabolism                       | gi 674577428 emb CDS36875.1 |
| 369 | 12  | 0.015  | 2 | 2 | expressed conserved protein                               | -                                | gi 674577450 emb CDS36897.1 |
| 370 | 46  | 0.015  | 2 | 4 | calcium binding protein calreticulin precursor            | -                                | gi 14029538 gb AAK52725.1   |
| 371 | 26  | 0.019  | 2 | 3 | ES1 protein mitochondrial                                 | Metabolism                       | gi 674568144 emb CDS17259.1 |
| 372 | 25  | 0.0074 | 2 | 2 | NADH dehydrogenase ubiquinone iron sulfur                 | Energy production and conversion | gi 674561353 emb CDS24291.1 |
| 373 | 56  | 0.0074 | 2 | 2 | protein disulfide isomerase A3                            | Post-translational modification  | gi 674572082 emb CDS42507.1 |
| 374 | 48  | 0.0074 | 2 | 2 | mitogen activated protein kinase                          | Signal transduction              | gi 674574349 emb CDS41278.1 |
| 375 | 47  | 0.011  | 2 | 2 | Enolase                                                   | Metabolism                       | gi 576691849 gb EUB55524.1  |
| 376 | 20  | 0.0074 | 2 | 2 | ATP synthase subunit d                                    | -                                | gi 674575042 emb CDS39544.1 |
| 377 | 79  | 0.0074 | 2 | 2 | Long-chain-fatty-acid--CoA ligase 5                       | Metabolism                       | gi 576699113 gb EUB62642.1  |
| 378 | 97  | 0.0074 | 2 | 2 | Lon protease                                              | Post-translational modification  | gi 576696096 gb EUB59654.1  |

|     |     |        |   |   |                                                |                                  |                             |
|-----|-----|--------|---|---|------------------------------------------------|----------------------------------|-----------------------------|
| 379 | 84  | 0.019  | 2 | 4 | hypothetical protein                           | Function unknown                 | gi 21912588 emb CAD21549.1  |
| 380 | 13  | 0.0074 | 2 | 2 | expressed protein                              | -                                | gi 674571192 emb CDS43186.1 |
| 381 | 86  | 0.0074 | 2 | 2 | hypothetical transcript                        | -                                | gi 961440318 emb CDS37307.2 |
| 382 | 10  | 0.015  | 2 | 2 | immunogenic protein                            | -                                | gi 674577101 emb CDS37545.1 |
| 383 | 28  | 0.0074 | 2 | 2 | EF-1, partial                                  | Transcription                    | gi 7578954 gb AAF64192.1    |
| 384 | 17  | 0.0074 | 2 | 2 | 60S ribosomal protein L14                      | Transcription                    | gi 576698217 gb EUB61752.1  |
| 385 | 337 | 0.0074 | 2 | 2 | twitchin                                       | Signal transduction              | gi 674566777 emb CDS18123.1 |
| 386 | 239 | 0.0074 | 2 | 2 | otoferlin                                      | -                                | gi 674565985 emb CDS19081.1 |
| 387 | 63  | 0.0074 | 2 | 2 | T-complex protein 1 subunit epsilon            | Post-translational modification  | gi 576697091 gb EUB60637.1  |
| 388 | 26  | 0.011  | 2 | 2 | ATP synthase subunit O                         | Energy production and conversion | gi 576698231 gb EUB61766.1  |
| 389 | 92  | 0.0074 | 2 | 2 | U6 snRNA-associated Sm-like protein LSm8       | -                                | gi 576695080 gb EUB58655.1  |
| 390 | 43  | 0.0074 | 2 | 2 | WD40 repeat and tyve domain containing protein | -                                | gi 674561477 emb CDS24197.1 |
| 391 | 19  | 0.0074 | 2 | 2 | hypothetical protein EGR_00893                 | -                                | gi 576700828 gb EUB64349.1  |
| 392 | 36  | 0.0074 | 2 | 2 | Nuclear migration protein nudC                 | -                                | gi 576696811 gb EUB60360.1  |
| 393 | 35  | 0.0074 | 2 | 2 | Ts5 protein                                    | Transcription                    | gi 170783723 gb ACB37346.1  |
| 394 | 58  | 0.0074 | 2 | 2 | Calnexin                                       | -                                | gi 576694840 gb EUB58420.1  |
| 395 | 73  | 0.0074 | 2 | 2 | cationic amino acid transporter 4              | Metabolism                       | gi 674568117 emb CDS17231.1 |
| 396 | 11  | 0.011  | 2 | 2 | heat shock protein                             | Post-translational modification  | gi 576691723 gb EUB55405.1  |
| 397 | 21  | 0.011  | 2 | 2 | MACRO domain containing protein 2              | Function unknown                 | gi 674571215 emb CDS43209.1 |
| 398 | 19  | 0.015  | 2 | 4 | titin                                          | -                                | gi 961439545 emb CUT99041.1 |
| 399 | 14  | 0.0074 | 2 | 2 | NADH dehydrogenase ubiquinone 1 beta           | -                                | gi 674561702 emb CDS24017.1 |
| 400 | 88  | 0.0074 | 2 | 2 | microtubule associated protein 1A              | -                                | gi 674561041 emb CDS24648.1 |
| 401 | 54  | 0.0074 | 2 | 2 | titin                                          | -                                | gi 674567709 emb CDS16820.1 |
| 402 | 26  | 0.0074 | 2 | 2 | Ras-related protein Rab-2A                     | Function unknown                 | gi 576699325 gb EUB62853.1  |
| 403 | 29  | 0.0074 | 2 | 2 | Endophilin-B1                                  | -                                | gi 576695776 gb EUB59340.1  |
| 404 | 59  | 0.011  | 2 | 2 | T complex protein 1 subunit eta                | Post-translational modification  | gi 674562117 emb CDS23628.1 |
| 405 | 33  | 0.011  | 2 | 2 | aldo keto reductase family 1 member B4         | Function unknown                 | gi 674266305 emb CDI97752.1 |
| 406 | 50  | 0.022  | 2 | 2 | Tubulin beta chain                             | Structural/cytoskeletal proteins | gi 576695709 gb EUB59274.1  |
| 407 | 65  | 0.0074 | 2 | 2 | Fatty-acid amide hydrolase                     | Transcription                    | gi 576697203 gb EUB60748.1  |
| 408 | 22  | 0.0074 | 2 | 2 | Protein archease                               | Function unknown                 | gi 674266531 emb CDI97985.1 |
